# Supplementary material for: All-cause, cardiovascular disease and cancer mortality in the population of a large Italian area contaminated by perfluoroalkyl and polyfluoroalkyl substances (1980–2018)
Source: PubMed Central journal article supplement (PMC11022451; doi:10.1186/s12940-024-01074-2), 2024-04-16
Supplement: 12940_2024_1074_MOESM2_ESM.pdf [file 12940_2024_1074_MOESM2_ESM.pdf]

# All-cause, cardiovascular disease and cancer mortality in the population of a large Italian area contaminated by perfluoroalkyl and polyfluoroalkyl substances (1980-2018)

Annibale Biggeri<sup>1</sup>, Giorgia Stoppa<sup>1</sup>, Laura Facciolo<sup>2</sup>, Giuliano Fin<sup>2</sup>, Silvia Mancini<sup>3</sup>, Valerio Manno<sup>4</sup>, Giada Minelli<sup>4</sup>, Federica Zamagni<sup>3,\*</sup>, Michela Zamboni<sup>2</sup>, Dolores Catelan<sup>1</sup>, Lauro Bucchi<sup>3</sup>

<sup>1</sup> Unit of Biostatistics, Epidemiology and Public Health, Department of Cardiac, Thoracic, Vascular Sciences and Public Health, University of Padua, Padua, Italy

<sup>2</sup> *Comitato mamme NO-PFAS*, Vicenza, Padua, Verona, Italy

<sup>3</sup> Emilia-Romagna Cancer Registry, Romagna Cancer Institute, IRCCS Istituto Romagnolo per lo Studio dei Tumori (IRST) Dino Amadori, Meldola, Forlì, Italy

<sup>4</sup> Statistical Service, Istituto Superiore di Sanità, Rome, Italy

## Correspondence

Federica Zamagni, Emilia-Romagna Cancer Registry, Romagna Cancer Institute, IRCCS Istituto Romagnolo per lo Studio dei Tumori (IRST) Dino Amadori, 47014 Meldola, Forlì, Italy.

Email: federica.zamagni@irst.emr.it

## Supplementary materials

Supplementary Table S1

Supplementary Table S2

Supplementary Table S3

Supplementary Table S4

Supplementary Table S5A

Supplementary Table S5B

Supplementary Table S6

Supplementary Fig. S1

Supplementary Fig. S2

Supplementary Fig. S3

Supplementary Fig. S4

Supplementary Fig. S5

Supplementary Fig. S6

Supplementary Fig. S7

Supplementary Fig. S8

Supplementary Fig. S9

**Supplementary Table S1.** Distribution of perfluorooctanoic acid (PFOA) serum concentrations (ng/mL) by attained age at the first invitation to participate in the health surveillance plan and year of invitation. The numbers in each cell are (from the top to the bottom) the number of subjects, the 5th percentile, the mean (in bold), the median and the 95th percentile. Empty cells indicate a number of subjects <50. Data are from the perfluoroalkyl and polyfluoroalkyl substances (PFAS)-contaminated *Red area*.

| Age group (years) | Year of invitation |              |             |
|-------------------|--------------------|--------------|-------------|
|                   | 2017-2018          | 2019-2020    | 2021-2023   |
| <b>58-72</b>      |                    | 3480         | 7263        |
|                   |                    | 9.8          | 3.2         |
|                   |                    | <b>111.3</b> | <b>81.9</b> |
|                   |                    | 78.5         | 50.4        |
|                   |                    | 309.8        | 265.3       |
| <b>45-61</b>      | 1472               | 8443         | 1771        |
|                   | 9.1                | 3.6          | 3.1         |
|                   | <b>91.8</b>        | <b>71.2</b>  | <b>58.9</b> |
|                   | 64.7               | 41.1         | 34.3        |
|                   | 264.7              | 240.7        | 187.0       |
| <b>36-51</b>      | 7042               | 4841         | 78          |
|                   | 3.6                | 2.3          | 1.2         |
|                   | <b>62.0</b>        | <b>42.8</b>  | <b>26.6</b> |
|                   | 33.7               | 22.1         | 12.9        |
|                   | 217.7              | 149.0        | 112.2       |
| <b>26-41</b>      | 7783               | 847          | 100         |
|                   | 3.3                | 1.5          | 0.4         |
|                   | <b>60.5</b>        | <b>31.4</b>  | <b>20.8</b> |
|                   | 34.8               | 15.1         | 8.5         |
|                   | 203.3              | 118.7        | 93.8        |
| <b>15-31</b>      | 8721               | 899          | 263         |
|                   | 7.2                | 2.5          | 0.8         |
|                   | <b>65.2</b>        | <b>28.6</b>  | <b>15.9</b> |
|                   | 50.6               | 20.1         | 9.8         |
|                   | 170.3              | 81.4         | 48.5        |
| <b>15-17</b>      |                    | 1848         |             |
|                   |                    | 4.2          |             |
|                   |                    | <b>28.7</b>  |             |
|                   |                    | 24.2         |             |
|                   |                    | 67.0         |             |
| <b>14-18</b>      |                    | 96           | 1167        |
|                   |                    | 2.2          | 1.6         |
|                   |                    | <b>21.9</b>  | <b>12.9</b> |
|                   |                    | 19.0         | 9.9         |
|                   |                    | 52.0         | 33.0        |
| <b>14-16</b>      |                    |              | 660         |
|                   |                    |              | 1.7         |
|                   |                    |              | <b>9.8</b>  |
|                   |                    |              | 7.9         |
|                   |                    |              | 22.4        |
| <b>8-12</b>       | 182                | 1713         |             |
|                   | 7.7                | 4.6          |             |
|                   | <b>30.7</b>        | <b>26.8</b>  |             |
|                   | 25.8               | 21.7         |             |
|                   | 69.1               | 64.4         |             |
| <b>8-13</b>       |                    | 873          | 552         |
|                   |                    | 3.9          | 1.2         |
|                   |                    | <b>23.6</b>  | <b>7.8</b>  |
|                   |                    | 17.9         | 5.6         |
|                   |                    | 64.2         | 23.6        |

**Supplementary Table S1.** Continued

| Age group (years) | Year of invitation |           |            |
|-------------------|--------------------|-----------|------------|
|                   | 2017-2018          | 2019-2020 | 2021-2023  |
| 8-11              |                    |           | 746        |
|                   |                    |           | 1.1        |
|                   |                    |           | <b>7.8</b> |
|                   |                    |           | 5.0        |
|                   |                    |           | 22.5       |
| 7-9               |                    |           | 257        |
|                   |                    |           | 1.2        |
|                   |                    |           | <b>8.2</b> |
|                   |                    |           | 4.9        |
|                   |                    |           | 24.4       |

Note: The *Red area* includes the 30 municipalities in the provinces of Vicenza, Padua and Verona (northern Italy) connected to the PFAS-contaminated aqueduct. 2017-2023. Source: Regione del Veneto. Piano di sorveglianza sanitaria sulla popolazione esposta a PFAS. Rapporto n. 17. Maggio 2023 (<https://elezioni.regione.veneto.it/documents/10793/12935055/Bollettino+PFAS+n.+17+-+maggio+2023.pdf/95cd8c4c-8790-4725-b5b0-f3cd089b51cc>. Accessed 14 Feb 2024)

**Supplementary Table S2.** Distribution of perfluorooctanesulfonic acid (PFOS) serum concentrations (ng/mL) by attained age at first invitation to participate in the health surveillance plan and year of invitation. The numbers in each cell are (from the top to the bottom) the number of subjects, the 5th percentile, the mean (in bold), the median and the 95th percentile. Empty cells indicate a number of subjects <50. Data are from the perfluoroalkyl and polyfluoroalkyl substances (PFAS)-contaminated *Red area*.

| Age group (years) | Year of invitation |            |            |
|-------------------|--------------------|------------|------------|
|                   | 2017-2018          | 2019-2020  | 2021-2023  |
| <b>58-72</b>      |                    | 3480       | 7263       |
|                   |                    | 2.0        | 1.6        |
|                   |                    | <b>6.2</b> | <b>6.6</b> |
|                   |                    | 5.3        | 5.3        |
|                   |                    | 13.1       | 15.3       |
| <b>45-61</b>      | 1472               | 8443       | 1771       |
|                   | 1.6                | 1.4        | 1.4        |
|                   | <b>5.5</b>         | <b>5.8</b> | <b>5.2</b> |
|                   | 4.7                | 4.6        | 4.1        |
|                   | 12.0               | 13.8       | 12.1       |
| <b>36-51</b>      | 7042               | 4841       | 78         |
|                   | 1.2                | 1.3        | 0.7        |
|                   | <b>4.8</b>         | <b>4.8</b> | <b>4.3</b> |
|                   | 3.8                | 3.7        | 3.5        |
|                   | 11.0               | 11.4       | 10.2       |
| <b>26-41</b>      | 7783               | 847        | 100        |
|                   | 1.3                | 1.2        | 0.6        |
|                   | <b>4.7</b>         | <b>3.8</b> | <b>3.0</b> |
|                   | 3.8                | 3.0        | 2.3        |
|                   | 10.5               | 9.3        | 7.6        |
| <b>15-31</b>      | 8721               | 899        | 263        |
|                   | 1.5                | 1.1        | 0.6        |
|                   | <b>4.7</b>         | <b>3.3</b> | <b>2.9</b> |
|                   | 3.8                | 2.7        | 2.5        |
|                   | 10.3               | 7.2        | 6.1        |
| <b>15-17</b>      |                    | 1848       |            |
|                   |                    | 1.1        |            |
|                   |                    | <b>2.9</b> |            |
|                   |                    | 2.5        |            |
|                   |                    | 6.2        |            |
| <b>14-18</b>      |                    | 96         | 1167       |
|                   |                    | 1.0        | 0.7        |
|                   |                    | <b>2.1</b> | <b>2.1</b> |
|                   |                    | 1.8        | 1.8        |
|                   |                    | 4.3        | 4.5        |
| <b>14-16</b>      |                    |            | 660        |
|                   |                    |            | 0.7        |
|                   |                    |            | <b>2.1</b> |
|                   |                    |            | 1.7        |
|                   |                    |            | 4.4        |
| <b>8-12</b>       | 182                | 1713       |            |
|                   | 1.1                | 0.9        |            |
|                   | <b>3.3</b>         | <b>2.4</b> |            |
|                   | 2.4                | 2.0        |            |
|                   | 5.4                | 4.9        |            |
| <b>8-13</b>       |                    | 873        | 552        |
|                   |                    | 1.1        | 0.4        |
|                   |                    | <b>2.8</b> | <b>1.6</b> |
|                   |                    | 2.4        | 1.3        |
|                   |                    | 5.6        | 3.7        |

**Supplementary Table S2.** Continued

| Age group (years) | Year of invitation |           |            |
|-------------------|--------------------|-----------|------------|
|                   | 2017-2018          | 2019-2020 | 2021-2023  |
| 8-11              |                    |           | 746        |
|                   |                    |           | 0.5        |
|                   |                    |           | <b>1.7</b> |
|                   |                    |           | 1.4        |
|                   |                    |           | 4.0        |
| 7-9               |                    |           | 257        |
|                   |                    |           | 0.5        |
|                   |                    |           | <b>1.6</b> |
|                   |                    |           | 1.2        |
|                   |                    |           | 4.2        |

Note: The *Red area* includes the 30 municipalities in the provinces of Vicenza, Padua and Verona (northern Italy) connected to the PFAS-contaminated aqueduct.2017-2023. Source: Regione del Veneto. Piano di sorveglianza sanitaria sulla popolazione esposta a PFAS. Rapporto n. 17. Maggio 2023 (<https://elezioni.regione.veneto.it/documents/10793/12935055/Bollettino+PFAS+n.+17+-+maggio+2023.pdf/95cd8c4c-8790-4725-b5b0-f3cd089b51cc>. Accessed 14 Feb 2024)

**Supplementary Table S3.** Summary of the ICD-9 and ICD-10 (2019 version) codes used in the study with details of the causes of death considered

| ICD-9   | ICD-10                     | Cause of death                                                               | Details                                                                                                                                                                                                                     |
|---------|----------------------------|------------------------------------------------------------------------------|-----------------------------------------------------------------------------------------------------------------------------------------------------------------------------------------------------------------------------|
| 001-999 | A00-Z99.9                  | All causes                                                                   |                                                                                                                                                                                                                             |
| 140-208 | C00-C97                    | Malignant neoplasms                                                          | All malignant neoplasms, including the categories analysed in detail in this analysis                                                                                                                                       |
| 155     | C22                        | Malignant neoplasm of liver and intrahepatic bile ducts                      | Malignant neoplasm of liver and intrahepatic bile ducts, excluding gallbladder and extrahepatic bile ducts                                                                                                                  |
| 155.0   | C22.0, C22.2               | Malignant neoplasm of liver                                                  | Malignant neoplasm of liver including liver cell carcinoma and hepatoblastoma                                                                                                                                               |
| 157     | C25                        | Malignant neoplasm of pancreas                                               | Malignant neoplasm of pancreas                                                                                                                                                                                              |
| 162     | C33-C34                    | Malignant neoplasm of trachea, bronchus and lung                             | Malignant neoplasm of trachea, bronchus and lung excluding pleura                                                                                                                                                           |
| 174     | C50                        | Malignant neoplasm of breast                                                 | Malignant neoplasms of female breast                                                                                                                                                                                        |
| 182     | C54                        | Malignant neoplasm of corpus uteri                                           | Malignant neoplasm of corpus uteri                                                                                                                                                                                          |
| 183     | C56-C57                    | Malignant neoplasms of ovary and other and unspecified female genital organs | Malignant neoplasms of ovary and other and unspecified female genital organs. They include Fallopian tube, broad ligament, round ligament and parametrium                                                                   |
| 186     | C62                        | Malignant neoplasm of testis                                                 | Malignant neoplasm of testis. They include malignant tumour of undescended, descended and unspecified testis                                                                                                                |
| 189     | C64-C66, C68               | Malignant neoplasms of kidney and other and unspecified urinary organs       | Malignant neoplasm of kidney, renal pelvis, ureter, urethra, paraurethral glands and contiguous or overlapping sites, excluding bladder                                                                                     |
| 193     | C73                        | Malignant neoplasm of thyroid gland                                          | Malignant neoplasms of thyroid gland                                                                                                                                                                                        |
| 200-208 | C81-C96                    | Malignant neoplasms of lymphoid, haematopoietic and related tissue           | All solid and non-solid malignant tumours of the lymphatic and hematopoietic tissue                                                                                                                                         |
| 250     | E10-E14                    | Diabetes mellitus                                                            | Diabetes mellitus including acute problems (e.g. hypoglycaemic coma, ketoacidosis) and complications (renal or ophthalmic complications, neurological and peripheral circulatory complications)                             |
| 390-459 | I00-I99                    | Diseases of the circulatory system                                           | Including the categories of heart disease described below, cerebrovascular disease, diseases of the arteries (atherosclerosis, aneurysms, embolisms and vasculitis), veins (thrombosis and embolisms) and lymphatic vessels |
| 390-429 | I00-I09, I11, I13, I20-I51 | Heart diseases                                                               | Including rheumatic, hypertensive, and ischaemic heart diseases described below, pulmonary circulation diseases, pericardial, endocardial and myocardial disease, conduction disorders and heart failure                    |
| 410-414 | I20-I25                    | Ischaemic heart diseases                                                     | Ischaemic heart diseases                                                                                                                                                                                                    |
| 520-579 | K00-K93                    | Diseases of the digestive system                                             | Diseases of the digestive system                                                                                                                                                                                            |

Abbreviation: *ICD-9* International classification of diseases, 9th revision; *ICD-10* International classification of diseases, 10th revision

**Supplementary Table S4.** See file Supplementary Table S4.xlsx





Supplementary Table S5A. Continued

| Cause of death (ICD9 code)                                                  | Area       | Sex | 1980-1984 |               | 1985-1989 |               | 1990-1994 |               | 1995-1999 |               | 2000-2004 |               | 2005-2009 |               | 2010-2014 |               | 2015-2018 |               | 1980-2018 |               | 1985-2018 |               |
|-----------------------------------------------------------------------------|------------|-----|-----------|---------------|-----------|---------------|-----------|---------------|-----------|---------------|-----------|---------------|-----------|---------------|-----------|---------------|-----------|---------------|-----------|---------------|-----------|---------------|
|                                                                             |            |     | Obs       | SMR (90% CI)  | Obs       | SMR (CI 90%)  | Obs       | SMR (90% CI)  | Obs       | SMR (90% CI)  | Obs       | SMR (90% CI)  | Obs       | SMR (90% CI)  | Obs       | SMR (90% CI)  | Obs       | SMR (90% CI)  | Obs       | SMR (90% CI)  | Obs       | SMR (90% CI)  |
| Malignant neoplasms of lymphoid-haematopoietic and related tissue (200-208) | Red area   | M   | 73        | 112 (92-137)  | 72        | 101 (82-123)  | 79        | 104 (85-125)  | 88        | 106 (88-127)  | 82        | 95 (79-115)   | 83        | 87 (72-104)   | 96        | 103 (87-122)  | 83        | 101 (84-121)  | 656       | 101 (94-107)  | 583       | 99 (93-106)   |
|                                                                             |            | F   | 50        | 95 (74-121)   | 56        | 88 (69-109)   | 79        | 105 (86-126)  | 65        | 81 (65-100)   | 85        | 101 (83-120)  | 71        | 85 (69-103)   | 74        | 84 (69-102)   | 65        | 89 (71-109)   | 545       | 91 (84-97)    | 495       | 90 (84-97)    |
|                                                                             | Red area A | M   | 33        | 113 (83-152)  | 28        | 88 (62-120)   | 35        | 103 (76-137)  | 38        | 104 (78-136)  | 40        | 105 (79-136)  | 40        | 93 (70-121)   | 42        | 99 (76-129)   | 33        | 88 (64-117)   | 289       | 99 (89-109)   | 256       | 97 (87-108)   |
|                                                                             |            | F   | 20        | 85 (56-123)   | 22        | 76 (51-108)   | 36        | 106 (79-140)  | 30        | 83 (60-113)   | 35        | 91 (67-120)   | 40        | 105 (79-136)  | 33        | 81 (60-109)   | 34        | 100 (74-133)  | 250       | 91 (82-101)   | 230       | 92 (82-102)   |
| Diabetes mellitus (250)                                                     | Red area   | M   | 67        | 91 (73-111)   | 73        | 101 (82-123)  | 52        | 75 (59-94)    | 72        | 103 (84-125)  | 57        | 79 (63-99)    | 77        | 94 (77-113)   | 96        | 104 (88-124)  | 100       | 121 (102-143) | 594       | 97 (90-104)   | 527       | 97 (91-105)   |
|                                                                             |            | F   | 130       | 89 (77-103)   | 168       | 113 (99-129)  | 113       | 88 (75-103)   | 112       | 99 (84-116)   | 119       | 108 (92-126)  | 136       | 115 (99-132)  | 149       | 125 (108-143) | 122       | 127 (108-147) | 1049      | 107 (102-113) | 919       | 110 (104-116) |
|                                                                             | Red area A | M   | 27        | 82 (58-113)   | 38        | 117 (88-154)  | 28        | 91 (65-125)   | 23        | 75 (51-106)   | 28        | 88 (63-121)   | 32        | 88 (64-118)   | 52        | 125 (98-158)  | 51        | 135 (105-170) | 279       | 102 (92-112)  | 252       | 104 (94-116)  |
|                                                                             |            | F   | 69        | 104 (84-127)  | 76        | 112 (91-135)  | 52        | 89 (69-112)   | 47        | 91 (70-116)   | 51        | 100 (78-127)  | 57        | 104 (83-130)  | 69        | 125 (101-152) | 48        | 108 (84-138)  | 469       | 104 (96-113)  | 400       | 104 (96-113)  |
| Diseases of the circulatory system (390-459)                                | Red area   | M   | 1706      | 103 (99-107)  | 1534      | 107 (103-112) | 1510      | 114 (109-119) | 1422      | 106 (101-111) | 1409      | 118 (112-123) | 1309      | 117 (111-122) | 1282      | 117 (112-123) | 984       | 114 (108-120) | 11156     | 111 (110-113) | 9450      | 113 (111-115) |
|                                                                             |            | F   | 1802      | 102 (98-106)  | 1781      | 109 (105-113) | 1817      | 113 (109-118) | 1834      | 113 (108-117) | 1744      | 112 (108-117) | 1613      | 108 (103-112) | 1739      | 114 (110-119) | 1427      | 117 (112-123) | 13757     | 111 (109-112) | 11955     | 112 (111-114) |
|                                                                             | Red area A | M   | 775       | 103 (97-110)  | 727       | 113 (106-120) | 724       | 123 (116-131) | 656       | 112 (105-120) | 663       | 126 (118-135) | 625       | 126 (118-135) | 610       | 123 (115-131) | 473       | 120 (111-129) | 5253      | 117 (115-120) | 4478      | 120 (117-123) |
|                                                                             |            | F   | 848       | 105 (99-111)  | 824       | 109 (103-116) | 945       | 129 (122-136) | 858       | 115 (109-122) | 851       | 118 (111-125) | 773       | 112 (105-118) | 875       | 124 (117-131) | 731       | 131 (123-139) | 6705      | 117 (115-120) | 5857      | 119 (117-122) |
| Heart diseases (390-429)                                                    | Red area   | M   | 1080      | 98 (93-103)   | 926       | 99 (94-105)   | 996       | 110 (105-116) | 967       | 101 (96-106)  | 1025      | 116 (111-123) | 976       | 118 (112-125) | 951       | 115 (109-122) | 711       | 110 (103-117) | 7632      | 108 (106-110) | 6552      | 110 (108-112) |
|                                                                             |            | F   | 1052      | 94 (89-99)    | 1010      | 103 (98-108)  | 1083      | 105 (100-111) | 1215      | 109 (104-114) | 1212      | 111 (105-116) | 1126      | 105 (100-110) | 1248      | 114 (109-119) | 1030      | 116 (110-122) | 8976      | 107 (105-109) | 7924      | 109 (107-111) |
|                                                                             | Red area A | M   | 490       | 98 (91-106)   | 436       | 104 (96-113)  | 457       | 114 (105-123) | 428       | 102 (94-111)  | 473       | 123 (113-132) | 467       | 128 (119-139) | 453       | 121 (112-131) | 330       | 111 (101-122) | 3534      | 112 (109-115) | 3044      | 114 (111-118) |
|                                                                             |            | F   | 508       | 99 (92-107)   | 457       | 101 (93-109)  | 541       | 115 (107-124) | 544       | 107 (99-115)  | 591       | 117 (109-125) | 544       | 110 (102-118) | 610       | 120 (112-129) | 509       | 125 (116-134) | 4304      | 111 (109-114) | 3796      | 113 (110-116) |
| Ischaemic heart diseases (410-414)                                          | Red area   | M   | 607       | 98 (91-104)   | 543       | 103 (96-111)  | 574       | 112 (105-120) | 561       | 108 (101-116) | 570       | 121 (112-129) | 559       | 121 (113-130) | 523       | 121 (113-131) | 353       | 114 (104-125) | 4290      | 111 (109-114) | 3683      | 114 (111-117) |
|                                                                             |            | F   | 426       | 88 (81-95)    | 445       | 108 (100-117) | 479       | 106 (98-114)  | 540       | 116 (108-125) | 570       | 119 (111-127) | 562       | 115 (107-123) | 536       | 119 (110-127) | 356       | 118 (108-129) | 3914      | 111 (108-114) | 3488      | 114 (111-118) |
|                                                                             | Red area A | M   | 258       | 92 (83-102)   | 248       | 105 (95-117)  | 250       | 110 (99-122)  | 234       | 103 (92-115)  | 257       | 124 (111-137) | 274       | 135 (122-149) | 258       | 132 (119-146) | 154       | 109 (95-124)  | 1933      | 113 (108-117) | 1675      | 117 (112-121) |
|                                                                             |            | F   | 200       | 91 (80-102)   | 190       | 101 (89-114)  | 244       | 118 (106-131) | 239       | 113 (101-125) | 276       | 125 (113-138) | 281       | 124 (112-137) | 266       | 127 (114-141) | 180       | 130 (114-147) | 1876      | 115 (111-120) | 1676      | 119 (115-124) |
| Diseases of the digestive system (520-579)                                  | Red area   | M   | 283       | 103 (93-113)  | 266       | 119 (107-131) | 216       | 116 (104-130) | 178       | 116 (102-132) | 160       | 110 (96-126)  | 146       | 109 (95-125)  | 166       | 132 (115-150) | 119       | 115 (99-134)  | 1534      | 114 (109-119) | 1251      | 117 (111-122) |
|                                                                             |            | F   | 187       | 116 (103-131) | 180       | 114 (100-128) | 146       | 91 (79-105)   | 186       | 121 (107-137) | 145       | 97 (85-112)   | 156       | 112 (98-128)  | 179       | 128 (113-145) | 148       | 125 (108-143) | 1327      | 113 (107-118) | 1140      | 112 (107-118) |
|                                                                             | Red area A | M   | 146       | 119 (103-136) | 129       | 129 (111-149) | 110       | 134 (113-157) | 97        | 144 (121-170) | 73        | 113 (92-137)  | 71        | 118 (96-144)  | 85        | 148 (122-177) | 55        | 116 (92-145)  | 766       | 127 (120-135) | 620       | 129 (121-138) |
|                                                                             |            | F   | 103       | 142 (120-167) | 97        | 134 (112-159) | 70        | 96 (78-118)   | 96        | 138 (116-163) | 73        | 107 (87-130)  | 59        | 92 (73-114)   | 81        | 125 (103-151) | 66        | 121 (97-148)  | 645       | 120 (112-128) | 542       | 116 (108-125) |

**Supplementary Table S5B.** Sensitivity analysis. Observed number of deaths (Obs), standardised mortality ratios (SMR) and 90% confidence interval (CI) by cause of death, area, sex and calendar period. The *Red area* includes the 30 municipalities of the Veneto Region connected to the perfluoroalkyl and polyfluoroalkyl substances (PFAS)-contaminated aqueduct. The *Red area A* includes the subset of 13 municipalities with PFAS contamination of the groundwater too. The reference population is the population of the three provinces of Vicenza, Padua and Verona (northern Italy) minus the 30 municipalities of the Red Area. 1980-2018

| Cause of death (ICD9 code)                                                  | Area       | Sex | 1980-1984 |               | 1985-1989       |               | 1990-1994 |               | 1995-1999 |               | 2000-2004    |               | 2005-2009 |               | 2010-2014 |               | 2015-2018 |               | 1980-2018 |               | 1985-2018    |               |   |              |
|-----------------------------------------------------------------------------|------------|-----|-----------|---------------|-----------------|---------------|-----------|---------------|-----------|---------------|--------------|---------------|-----------|---------------|-----------|---------------|-----------|---------------|-----------|---------------|--------------|---------------|---|--------------|
|                                                                             |            |     | Obs       | SMR (90% CI)  | Obs             | SMR (90% CI)  | Obs       | SMR (90% CI)  | Obs       | SMR (90% CI)  | Obs          | SMR (90% CI)  | Obs       | SMR (90% CI)  | Obs       | SMR (90% CI)  | Obs       | SMR (90% CI)  | Obs       | SMR (90% CI)  | Obs          | SMR (90% CI)  |   |              |
| All causes (001-999)                                                        | Red area   | M   | 4037      | 104 (101-107) | 3957            | 108 (105-111) | 3833      | 108 (105-111) | 3729      | 107 (104-110) | 3663         | 111 (108-114) | 3539      | 108 (105-111) | 3763      | 113 (110-117) | 3108      | 114 (110-117) | 29629     | 109 (108-110) | 25592        | 110 (109-111) |   |              |
|                                                                             |            | F   | 3489      | 104 (101-107) | 3546            | 106 (103-109) | 3580      | 107 (104-110) | 3652      | 106 (103-109) | 3627         | 105 (102-108) | 3719      | 105 (102-108) | 4211      | 111 (108-114) | 3694      | 114 (111-117) | 29518     | 107 (106-108) | 26029        | 108 (107-109) |   |              |
|                                                                             | Red area A | M   | 1839      | 105 (101-109) | 1808            | 110 (106-114) | 1781      | 113 (109-118) | 1717      | 112 (107-116) | 1641         | 113 (108-117) | 1603      | 110 (105-114) | 1732      | 115 (110-119) | 1459      | 116 (111-122) | 13580     | 111 (110-113) | 11741        | 113 (111-114) |   |              |
| Malignant neoplasms (140-208)                                               | Red area   | M   | 1075      | 101 (96-106)  | 1238            | 106 (101-111) | 1265      | 106 (102-112) | 1223      | 107 (102-112) | 1220         | 110 (104-115) | 1158      | 101 (96-106)  | 1221      | 110 (105-115) | 930       | 109 (103-115) | 9330      | 106 (104-108) | 8255         | 107 (105-109) |   |              |
|                                                                             |            | F   | 642       | 95 (89-101)   | 729             | 94 (88-100)   | 754       | 93 (87-98)    | 784       | 95 (89-100)   | 795          | 94 (88-99)    | 885       | 99 (94-105)   | 907       | 99 (94-104)   | 725       | 98 (92-104)   | 6221      | 96 (94-98)    | 5579         | 96 (94-98)    |   |              |
|                                                                             | Red area A | M   | 444       | 93 (86-101)   | 517             | 100 (92-107)  | 557       | 106 (99-114)  | 540       | 107 (100-115) | 527          | 107 (99-114)  | 475       | 93 (86-100)   | 538       | 106 (99-114)  | 426       | 109 (100-118) | 4024      | 102 (100-105) | 3580         | 104 (101-107) |   |              |
| Malignant neoplasm of liver and intrahepatic bile ducts (155)               | Red area   | M   | 58        | 125 (99-155)  | 66              | 105 (85-129)  | 83        | 106 (87-127)  | 94        | 123 (103-146) | 86           | 111 (92-133)  | 80        | 100 (82-120)  | 93        | 117 (98-139)  | 64        | 107 (86-132)  | 624       | 111 (104-119) | 566          | 110 (102-118) |   |              |
|                                                                             |            | F   | 22        | 79 (53-108)   | 37              | 122 (91-156)  | 31        | 90 (65-118)   | 43        | 115 (88-145)  | 35           | 96 (71-124)   | 42        | 118 (90-149)  | 37        | 98 (73-126)   | 27        | 98 (69-131)   | 274       | 103 (93-113)  | 252          | 105 (95-117)  |   |              |
|                                                                             | Red area A | M   | 146       | 119 (103-136) | 129             | 131 (112-151) | 110       | 135 (115-158) | 97        | 145 (122-172) | 73           | 114 (93-138)  | 71        | 119 (97-145)  | 85        | 151 (125-181) | 55        | 117 (92-147)  | 284       | 113 (102-125) | 259          | 113 (101-125) |   |              |
| Malignant neoplasm of liver (155.0)                                         | Red area   | M   | 37        | 125 (93-164)  | 34              | 96 (71-128)   | 53        | 98 (77-123)   | 45        | 97 (74-124)   | 38           | 93 (70-122)   | 34        | 100 (74-133)  | 51        | 111 (87-141)  | 29        | 118 (84-161)  | 321       | 103 (94-113)  | 284          | 101 (91-111)  |   |              |
|                                                                             |            | F   | 13        | 81 (48-128)   | 13              | 108 (64-172)  | 17        | 96 (61-144)   | 21        | 127 (85-183)  | 12           | 80 (46-130)   | 15        | 124 (77-192)  | 13        | 95 (56-152)   | 7         | 93 (44-175)   | 111       | 100 (85-118)  | 98           | 104 (87-123)  |   |              |
|                                                                             | Red area A | M   | 16        | 122 (76-185)  | 12              | 77 (44-124)   | 26        | 109 (76-151)  | 23        | 112 (77-159)  | 19           | 105 (69-154)  | 22        | 144 (98-206)  | 24        | 115 (79-161)  | 12        | 106 (61-171)  | 154       | 110 (97-127)  | 138          | 110 (95-127)  |   |              |
| Malignant neoplasm of pancreas (157)                                        | Red area   | M   | 50        | 127 (99-161)  | 52              | 109 (85-137)  | 66        | 119 (96-146)  | 57        | 106 (84-132)  | 64           | 105 (84-129)  | 66        | 103 (83-127)  | 96        | 130 (109-154) | 63        | 102 (82-126)  | 514       | 112 (104-121) | 464          | 111 (103-120) |   |              |
|                                                                             |            | F   | 27        | 80 (56-110)   | 44              | 98 (75-126)   | 39        | 72 (54-94)    | 44        | 76 (58-97)    | 64           | 95 (76-117)   | 67        | 90 (72-110)   | 84        | 105 (87-126)  | 63        | 92 (74-114)   | 432       | 90 (83-97)    | 405          | 90 (83-98)    |   |              |
|                                                                             | Red area A | M   | 21        | 120 (81-173)  | 23              | 108 (74-153)  | 28        | 114 (81-157)  | 25        | 106 (73-148)  | 30           | 110 (79-149)  | 29        | 101 (72-138)  | 45        | 134 (103-172) | 26        | 92 (64-127)   | 227       | 111 (100-123) | 206          | 110 (98-123)  |   |              |
| Malignant neoplasm of trachea, bronchus and lung (162)                      | Red area   | M   | 339       | 98 (90-108)   | 402             | 109 (100-118) | 461       | 125 (116-135) | 366       | 105 (96-114)  | 359          | 112 (102-122) | 341       | 111 (101-121) | 304       | 110 (100-121) | 235       | 115 (103-128) | 2807      | 110 (107-114) | 2468         | 112 (109-116) |   |              |
|                                                                             |            | F   | 49        | 87 (67-108)   | 49              | 75 (58-93)    | 60        | 81 (64-99)    | 68        | 78 (63-94)    | 78           | 79 (65-94)    | 105       | 100 (85-117)  | 105       | 89 (75-103)   | 93        | 97 (81-115)   | 607       | 87 (81-93)    | 558          | 87 (81-93)    |   |              |
|                                                                             | Red area A | M   | 137       | 90 (78-104)   | 167             | 102 (90-116)  | 181       | 112 (98-126)  | 165       | 107 (94-122)  | 149          | 104 (91-120)  | 125       | 91 (78-105)   | 131       | 105 (90-122)  | 96        | 102 (86-121)  | 1151      | 102 (97-107)  | 1014         | 104 (98-109)  |   |              |
| Malignant neoplasm of testis (186)                                          | Red area   | M   | <3        | 54 (2-259)    | 6 186 (81-368)  |               |           |               |           |               | <3 0 (0-88)  |               |           |               |           |               |           |               | 7         |               | 91 (42-172)  |               | 6 | 103 (45-203) |
|                                                                             | Red area A | M   | <3        | 92 (4-436)    | 5 263 (103-552) |               |           |               |           |               | <3 0 (0-147) |               |           |               |           |               |           |               | 6         |               | 132 (57-260) |               | 5 | 144 (57-302) |
| Malignant neoplasm of ovary (183)                                           | Red area   | F   | 30        | 103 (74-140)  | 40              | 101 (76-131)  | 32        | 77 (56-103)   | 42        | 115 (87-149)  | 41           | 107 (81-139)  | 38        | 97 (72-127)   | 37        | 91 (68-120)   | 41        | 120 (91-155)  | 301       | 101 (91-111)  | 271          | 100 (91-111)  |   |              |
|                                                                             | Red area A | F   | 11        | 85 (48-140)   | 19              | 107 (70-157)  | 11        | 59 (33-98)    | 17        | 103 (66-155)  | 20           | 114 (76-166)  | 13        | 72 (43-115)   | 18        | 97 (62-143)   | 14        | 88 (53-137)   | 123       | 91 (78-105)   | 112          | 91 (77-107)   |   |              |
| Malignant neoplasm of corpus uteri (182)                                    | Red area   | F   | 5         | 78 (31-164)   | 6               | 108 (47-214)  | 12        | 138 (79-223)  | 6         | 77 (33-151)   | 11           | 121 (68-200)  | 7         | 75 (35-140)   | 9         | 90 (47-158)   | 10        | 117 (63-198)  | 66        | 101 (81-124)  | 61           | 103 (83-128)  |   |              |
|                                                                             | Red area A | F   | 4         | 139 (47-318)  | 3               | 120 (32-310)  | 6         | 153 (67-303)  | <3        | 57 (10-178)   | 5            | 121 (47-253)  | 4         | 93 (32-213)   | 3         | 65 (18-168)   | <3        | 50 (9-158)    | 29        | 97 (70-132)   | 25           | 93 (64-129)   |   |              |
| Malignant neoplasm of breast (174)                                          | Red area   | F   | 141       | 113 (97-129)  | 143             | 99 (86-114)   | 146       | 96 (84-111)   | 155       | 98 (85-111)   | 110          | 75 (64-88)    | 159       | 105 (92-120)  | 153       | 102 (89-116)  | 124       | 97 (83-113)   | 1131      | 98 (93-103)   | 990          | 96 (91-101)   |   |              |
|                                                                             | Red area A | F   | 64        | 114 (92-141)  | 62              | 96 (77-118)   | 69        | 101 (82-124)  | 80        | 112 (92-134)  | 44           | 66 (50-84)    | 74        | 106 (87-129)  | 70        | 101 (82-123)  | 69        | 117 (94-142)  | 532       | 101 (94-109)  | 468          | 100 (92-108)  |   |              |
| Malignant neoplasm of the thyroid gland (193)                               | Red area   | M   | 3         | 108 (29-278)  | <3              | 31 (1-147)    | <3        | 83 (14-262)   | <3        | 40 (2-189)    | 4            | 165 (56-377)  | <3        | 85 (15-267)   | <3        | 30 (1-140)    | 3         | 172 (47-445)  | 17        | 82 (52-123)   | 14           | 78 (47-122)   |   |              |
|                                                                             |            | F   | 5         | 91 (36-192)   | 7               | 122 (57-228)  | 4         | 59 (20-135)   | 4         | 75 (25-171)   | 8            | 152 (76-275)  | <3        | 47 (8-147)    | <3        | 44 (8-137)    | 3         | 79 (21-205)   | 35        | 85 (63-113)   | 30           | 84 (60-114)   |   |              |
|                                                                             | Red area A | M   | <3        | 81 (3-385)    | <3              | 70 (3-333)    | <3        | 189 (33-595)  | <3        | 91 (4-430)    | 4            | 371 (126-849) | <3        | 95 (4-450)    | <3        | 65 (3-309)    | <3        | 125 (5-593)   | 12        | 130 (75-210)  | 11           | 137 (77-227)  |   |              |
| Malignant neoplasm of kidney and other and unspecified urinary organs (189) | Red area   | M   | 20        | 90 (60-131)   | 28              | 103 (73-141)  | 40        | 118 (89-153)  | 37        | 118 (88-155)  | 31           | 109 (79-148)  | 29        | 84 (60-115)   | 38        | 98 (73-128)   | 43        | 130 (100-168) | 266       | 107 (96-118)  | 246          | 108 (97-120)  |   |              |
|                                                                             |            | F   | 12        | 92 (53-139)   | 16              | 108 (67-155)  | 22        | 109 (74-150)  | 15        | 90 (56-131)   | 18           | 102 (66-145)  | 17        | 83 (53-119)   | 24        | 116 (84-171)  | 22        | 124 (84-171)  | 146       | 104 (90-119)  | 134          | 105 (90-121)  |   |              |
|                                                                             | Red area A | M   | 7         | 71 (33-134)   | 11              | 91 (51-151)   | 17        | 113 (72-170)  | 10        | 72 (39-123)   | 12           | 95 (55-154)   | 7         | 45 (21-85)    | 15        | 85 (52-131)   | 27        | 178 (126-246) | 106       | 95 (80-112)   | 99           | 97 (82-115)   |   |              |
|                                                                             |            | F   | 5         | 85 (33-179)   | 5               | 74 (29-156)   | 13        | 143 (85-227)  | 11        | 148 (83-244)  | 8            | 100 (50-181)  | 7         | 76 (35-142)   | 11        | 116 (65-192)  | 14        | 171 (104-268) | 74        | 116 (94-140)  | 69           | 119 (96-145)  |   |              |

Supplementary Table S5B. Continued

| Cause of death (ICD9 code)                                                   | Area       | Sex | 1980-1984 |               | 1985-1989 |               | 1990-1994 |               | 1995-1999 |               | 2000-2004 |               | 2005-2009 |               | 2010-2014 |               | 2015-2018 |               | 1980-2018 |               | 1985-2018 |               |
|------------------------------------------------------------------------------|------------|-----|-----------|---------------|-----------|---------------|-----------|---------------|-----------|---------------|-----------|---------------|-----------|---------------|-----------|---------------|-----------|---------------|-----------|---------------|-----------|---------------|
|                                                                              |            |     | Obs       | SMR (90% CI)  | Obs       | SMR (90% CI)  | Obs       | SMR (90% CI)  | Obs       | SMR (90% CI)  | Obs       | SMR (90% CI)  | Obs       | SMR (90% CI)  | Obs       | SMR (90% CI)  | Obs       | SMR (90% CI)  | Obs       | SMR (90% CI)  | Obs       | SMR (90% CI)  |
| Malignant neoplasms of lymphoid, haematopoietic and related tissue (200-208) | Red area   | M   | 73        | 113 (92-138)  | 72        | 101 (82-123)  | 79        | 104 (86-125)  | 88        | 107 (89-127)  | 82        | 95 (79-114)   | 83        | 86 (71-103)   | 96        | 104 (87-123)  | 83        | 101 (84-121)  | 656       | 101 (94-107)  | 583       | 99 (93-106)   |
|                                                                              |            | F   | 50        | 95 (74-118)   | 56        | 87 (69-107)   | 79        | 105 (86-125)  | 65        | 81 (65-98)    | 85        | 100 (83-119)  | 71        | 85 (69-102)   | 74        | 83 (68-100)   | 65        | 88 (71-107)   | 545       | 90 (84-97)    | 495       | 90 (83-97)    |
|                                                                              | Red area A | M   | 33        | 114 (84-153)  | 28        | 88 (62-121)   | 35        | 104 (77-138)  | 38        | 104 (78-137)  | 40        | 104 (79-136)  | 40        | 92 (70-120)   | 42        | 100 (76-129)  | 33        | 88 (64-117)   | 289       | 99 (89-109)   | 256       | 97 (87-108)   |
|                                                                              |            | F   | 20        | 84 (56-122)   | 22        | 76 (51-108)   | 36        | 106 (79-140)  | 30        | 83 (60-112)   | 35        | 90 (67-120)   | 40        | 104 (79-136)  | 33        | 81 (59-108)   | 34        | 100 (73-133)  | 250       | 91 (82-101)   | 230       | 92 (82-102)   |
| Diabetes mellitus (250)                                                      | Red area   | M   | 67        | 91 (73-111)   | 73        | 101 (82-123)  | 52        | 73 (58-93)    | 72        | 103 (84-125)  | 57        | 78 (62-97)    | 77        | 93 (77-113)   | 96        | 105 (88-124)  | 100       | 122 (103-144) | 594       | 96 (90-103)   | 527       | 97 (90-105)   |
|                                                                              |            | F   | 130       | 89 (77-102)   | 168       | 114 (100-129) | 113       | 87 (74-101)   | 112       | 98 (83-114)   | 119       | 108 (92-125)  | 136       | 115 (100-132) | 149       | 125 (109-143) | 122       | 128 (109-147) | 1049      | 107 (102-113) | 919       | 110 (104-117) |
|                                                                              | Red area A | M   | 27        | 81 (57-112)   | 38        | 117 (88-154)  | 28        | 89 (63-122)   | 23        | 75 (51-107)   | 28        | 87 (62-120)   | 32        | 88 (64-118)   | 52        | 125 (98-158)  | 51        | 137 (107-172) | 279       | 101 (92-112)  | 252       | 104 (94-116)  |
|                                                                              |            | F   | 69        | 104 (84-127)  | 76        | 113 (92-136)  | 52        | 88 (69-111)   | 47        | 90 (70-115)   | 51        | 101 (79-127)  | 57        | 105 (83-131)  | 69        | 126 (102-154) | 48        | 109 (85-139)  | 469       | 104 (97-113)  | 400       | 105 (96-114)  |
| Diseases of the circulatory system (390-459)                                 | Red area   | M   | 1706      | 103 (99-107)  | 1534      | 108 (103-113) | 1510      | 115 (110-120) | 1422      | 106 (102-111) | 1409      | 119 (114-124) | 1309      | 118 (112-123) | 1282      | 119 (113-124) | 984       | 115 (109-121) | 11156     | 112 (110-114) | 9450      | 114 (112-116) |
|                                                                              |            | F   | 1802      | 102 (98-106)  | 1781      | 110 (105-114) | 1817      | 114 (110-119) | 1834      | 114 (109-118) | 1744      | 113 (109-117) | 1613      | 108 (104-113) | 1739      | 115 (111-120) | 1427      | 119 (114-124) | 13757     | 111 (110-113) | 11955     | 113 (111-115) |
|                                                                              | Red area A | M   | 775       | 104 (97-110)  | 727       | 113 (107-121) | 724       | 124 (117-132) | 656       | 113 (105-120) | 663       | 128 (120-136) | 625       | 128 (119-136) | 610       | 124 (116-133) | 473       | 121 (112-130) | 5253      | 118 (115-121) | 4478      | 121 (118-124) |
|                                                                              |            | F   | 848       | 105 (99-111)  | 824       | 110 (104-116) | 945       | 130 (123-137) | 858       | 116 (110-123) | 851       | 119 (112-126) | 773       | 112 (106-119) | 875       | 125 (118-133) | 731       | 132 (124-141) | 6705      | 118 (116-121) | 5857      | 120 (118-123) |
| Heart diseases (390-429)                                                     | Red area   | M   | 1080      | 98 (93-103)   | 926       | 99 (94-105)   | 996       | 111 (105-117) | 967       | 101 (96-106)  | 1025      | 118 (112-124) | 976       | 120 (113-126) | 951       | 117 (110-123) | 711       | 110 (104-117) | 7632      | 108 (106-111) | 6552      | 110 (108-113) |
|                                                                              |            | F   | 1052      | 94 (89-98)    | 1010      | 103 (98-109)  | 1083      | 106 (101-111) | 1215      | 110 (104-115) | 1212      | 111 (106-117) | 1126      | 106 (100-111) | 1248      | 115 (110-120) | 1030      | 117 (111-123) | 8976      | 107 (106-109) | 7924      | 110 (108-112) |
|                                                                              | Red area A | M   | 490       | 98 (91-106)   | 436       | 104 (96-113)  | 457       | 115 (106-124) | 428       | 102 (94-111)  | 473       | 124 (115-134) | 467       | 130 (120-140) | 453       | 122 (113-132) | 330       | 112 (102-122) | 3534      | 112 (109-116) | 3044      | 115 (112-119) |
|                                                                              |            | F   | 508       | 99 (92-107)   | 457       | 101 (94-109)  | 541       | 116 (108-124) | 544       | 107 (100-115) | 591       | 117 (109-126) | 544       | 110 (102-118) | 610       | 121 (113-130) | 509       | 126 (117-136) | 4304      | 112 (109-115) | 3796      | 114 (111-117) |
| Ischaemic heart diseases (410-414)                                           | Red area   | M   | 607       | 97 (91-104)   | 543       | 103 (96-111)  | 574       | 113 (105-121) | 561       | 109 (101-116) | 570       | 122 (114-131) | 559       | 123 (114-132) | 523       | 123 (114-132) | 353       | 115 (105-126) | 4290      | 112 (109-115) | 3683      | 115 (112-118) |
|                                                                              |            | F   | 426       | 88 (81-95)    | 445       | 109 (101-117) | 479       | 106 (99-115)  | 540       | 117 (109-126) | 570       | 120 (112-129) | 562       | 116 (108-124) | 536       | 120 (111-129) | 356       | 119 (109-130) | 3914      | 112 (109-115) | 3488      | 115 (112-119) |
|                                                                              | Red area A | M   | 258       | 92 (83-102)   | 248       | 105 (95-117)  | 250       | 111 (100-123) | 234       | 104 (93-115)  | 257       | 125 (113-139) | 274       | 136 (123-151) | 258       | 134 (120-148) | 154       | 110 (96-125)  | 1933      | 113 (109-118) | 1675      | 118 (113-122) |
|                                                                              |            | F   | 200       | 90 (80-101)   | 190       | 101 (89-114)  | 244       | 119 (107-132) | 239       | 114 (102-127) | 276       | 126 (114-139) | 281       | 125 (113-138) | 266       | 128 (116-142) | 180       | 131 (116-149) | 1876      | 116 (112-121) | 1676      | 121 (116-125) |
| Diseases of the digestive system (520-579)                                   | Red area   | M   | 283       | 103 (93-113)  | 266       | 120 (108-133) | 216       | 118 (105-132) | 178       | 118 (103-133) | 160       | 111 (97-126)  | 146       | 110 (95-126)  | 166       | 134 (118-153) | 119       | 117 (100-136) | 1534      | 115 (110-120) | 1251      | 118 (113-124) |
|                                                                              |            | F   | 187       | 118 (104-133) | 180       | 115 (101-129) | 146       | 91 (79-104)   | 186       | 123 (108-138) | 145       | 98 (85-111)   | 156       | 113 (98-128)  | 179       | 130 (114-146) | 148       | 126 (110-144) | 1327      | 114 (108-119) | 1140      | 113 (107-118) |
|                                                                              | Red area A | M   | 146       | 119 (103-136) | 129       | 131 (112-151) | 110       | 135 (115-158) | 97        | 145 (122-172) | 73        | 114 (93-138)  | 71        | 119 (97-145)  | 85        | 151 (125-181) | 55        | 117 (92-147)  | 766       | 128 (121-136) | 620       | 131 (122-140) |
|                                                                              |            | F   | 103       | 144 (122-170) | 97        | 136 (114-161) | 70        | 96 (78-117)   | 96        | 140 (117-166) | 73        | 107 (87-130)  | 59        | 92 (74-115)   | 81        | 127 (105-153) | 66        | 122 (99-150)  | 645       | 121 (113-129) | 542       | 117 (109-126) |

**Supplementary Table S6.** Observed number of deaths (Obs) and standardised mortality ratio (SMR) in three broad calendar periods, ratio of SMR 1980-1989 to SMR 1980-2018, ratio of SMR 2010-2018 to SMR 1980-2018, and exact one-sided mid-p-values, by causes of death, area and sex. *Red area* includes the 30 municipalities connected to the perfluoroalkyl and polyfluoroalkyl substances (PFAS)-contaminated aqueduct. The *Red area A* includes the subset of 13 municipalities with PFAS contamination of the groundwater too

| Area              | Sex | Obs<br>1980-2018 | SMR<br>1980-2018 | Obs<br>1980-1989 | SMR<br>1980-1989 | Obs<br>2010-2018 | SMR<br>2010-2018 | RR<br>1980-1989 to<br>1980-2018<br>(mid-p-value) | RR<br>2010-2018 to<br>1980-2018<br>(mid-p-value) | Cause of death<br>(ICD-9 code)                                |
|-------------------|-----|------------------|------------------|------------------|------------------|------------------|------------------|--------------------------------------------------|--------------------------------------------------|---------------------------------------------------------------|
| <i>Red area</i>   | M   | 29,629           | 108              | 7994             | 106              | 6871             | 113              | 0.98 (0.05)                                      | 1.05 (<0.01)                                     | All causes (001-999)                                          |
|                   | F   | 29,518           | 107              | 7035             | 105              | 7905             | 111              | 0.98 (0.06)                                      | 1.04 (<0.01)                                     |                                                               |
| <i>Red area A</i> | M   | 13,580           | 111              | 3647             | 107              | 3191             | 115              | 0.96 (0.01)                                      | 1.04 (0.02)                                      |                                                               |
|                   | F   | 14,018           | 110              | 3274             | 106              | 3782             | 116              | 0.96 (0.02)                                      | 1.05 (<0.01)                                     |                                                               |
| <i>Red area</i>   | M   | 9330             | 106              | 2313             | 103              | 2151             | 109              | 0.97 (0.08)                                      | 1.03 (0.10)                                      | Malignant neoplasms (140-208)                                 |
|                   | F   | 6221             | 96               | 1371             | 94               | 1632             | 99               | 0.98 (0.22)                                      | 1.03 (0.11)                                      |                                                               |
| <i>Red area A</i> | M   | 4024             | 102              | 961              | 96               | 964              | 107              | 0.94 (0.03)                                      | 1.05 (0.07)                                      |                                                               |
|                   | F   | 2834             | 96               | 588              | 90               | 741              | 97               | 0.94 (0.06)                                      | 1.01 (0.39)                                      |                                                               |
| <i>Red area</i>   | M   | 624              | 110              | 124              | 113              | 157              | 112              | 1.03 (0.62)                                      | 1.02 (0.41)                                      | Malignant neoplasm of liver and intrahepatic bile ducts (155) |
|                   | F   | 274              | 102              | 59               | 101              | 64               | 98               | 0.99 (0.48)                                      | 0.96 (0.62)                                      |                                                               |
| <i>Red area A</i> | M   | 284              | 113              | 54               | 110              | 69               | 108              | 0.97 (0.43)                                      | 0.96 (0.64)                                      |                                                               |
|                   | F   | 118              | 97               | 22               | 83               | 18               | 61               | 0.86 (0.24)                                      | 0.63 (0.98)                                      |                                                               |
| <i>Red area</i>   | M   | 321              | 103              | 71               | 108              | 80               | 113              | 1.05 (0.66)                                      | 1.10 (0.20)                                      | Malignant neoplasm of liver (155.0)                           |
|                   | F   | 111              | 100              | 26               | 93               | 20               | 95               | 0.93 (0.37)                                      | 0.95 (0.58)                                      |                                                               |
| <i>Red area A</i> | M   | 154              | 111              | 28               | 97               | 36               | 111              | 0.87 (0.24)                                      | 1.00 (0.49)                                      |                                                               |
|                   | F   | 48               | 96               | 8                | 63               | 8                | 82               | 0.66 (0.11)                                      | 0.85 (0.65)                                      |                                                               |
| <i>Red area</i>   | M   | 514              | 112              | 102              | 116              | 159              | 116              | 1.04 (0.66)                                      | 1.04 (0.31)                                      | Malignant neoplasm of pancreas (157)                          |
|                   | F   | 432              | 90               | 71               | 78               | 147              | 99               | 0.87 (0.10)                                      | 1.10 (0.12)                                      |                                                               |
| <i>Red area A</i> | M   | 227              | 110              | 44               | 113              | 71               | 113              | 1.03 (0.59)                                      | 1.03 (0.39)                                      |                                                               |
|                   | F   | 192              | 88               | 26               | 73               | 74               | 109              | 0.83 (0.17)                                      | 1.24 (0.04)                                      |                                                               |
| <i>Red area</i>   | M   | 2807             | 110              | 741              | 103              | 539              | 112              | 0.94 (0.04)                                      | 1.02 (0.34)                                      | Malignant neoplasm of trachea, bronchus and lung (162)        |
|                   | F   | 607              | 87               | 98               | 81               | 198              | 93               | 0.93 (0.24)                                      | 1.07 (0.17)                                      |                                                               |
| <i>Red area A</i> | M   | 1151             | 101              | 304              | 96               | 227              | 103              | 0.95 (0.19)                                      | 1.02 (0.38)                                      |                                                               |
|                   | F   | 281              | 89               | 48               | 88               | 93               | 95               | 0.99 (0.48)                                      | 1.07 (0.26)                                      |                                                               |
| <i>Red area</i>   | F   | 1131             | 98               | 284              | 105              | 277              | 100              | 1.07 (0.88)                                      | 1.02 (0.37)                                      | Malignant neoplasm of breast (174)                            |
| <i>Red area A</i> | F   | 532              | 101              | 126              | 104              | 139              | 108              | 1.03 (0.63)                                      | 1.07 (0.21)                                      |                                                               |
| <i>Red area</i>   | F   | 66               | 101              | 11               | 92               | 19               | 103              | 0.91 (0.40)                                      | 1.02 (0.45)                                      | Malignant neoplasm of corpus uteri (182)                      |
| <i>Red area A</i> | F   | 29               | 97               | 7                | 131              | 5                | 58               | 1.35 (0.79)                                      | 0.60 (0.88)                                      |                                                               |
| <i>Red area</i>   | F   | 301              | 101              | 70               | 102              | 78               | 104              | 1.01 (0.54)                                      | 1.03 (0.39)                                      | Malignant neoplasm of ovary (183)                             |
| <i>Red area A</i> | F   | 123              | 91               | 30               | 98               | 32               | 92               | 1.08 (0.67)                                      | 1.01 (0.46)                                      |                                                               |
| <i>Red area</i>   | M   | 7                | 71               | 5                | 0                | <3               | 0                |                                                  |                                                  | Malignant neoplasm of testis (186)                            |
| <i>Red area A</i> | M   | 6                | 131              | 3                | 0                | <3               | 0                |                                                  |                                                  |                                                               |

Supplementary Table S6. Continued

| Area       | Sex | Obs<br>1980-2018 | SMR<br>1980-2018 | Obs<br>1980-1989 | SMR<br>1980-1989 | Obs<br>2010-2018 | SMR<br>2010-2018 | RR<br>1980-1989 to<br>1980-2018<br>(mid-p-value) | RR<br>2010-2018 to<br>1980-2018<br>(mid-p-value) | Cause of death<br>(ICD-9 code)                                               |
|------------|-----|------------------|------------------|------------------|------------------|------------------|------------------|--------------------------------------------------|--------------------------------------------------|------------------------------------------------------------------------------|
| Red area   | M   | 266              | 106              | 48               | 98               | 81               | 112              | 0.92 (0.30)                                      | 1.06 (0.31)                                      | Malignant neoplasm of kidney and other and unspecified urinary organs (189)  |
|            | F   | 146              | 104              | 28               | 102              | 46               | 119              | 0.98 (0.47)                                      | 1.14 (0.18)                                      |                                                                              |
| Red area A | M   | 106              | 95               | 18               | 83               | 42               | 127              | 0.87 (0.29)                                      | 1.34 (0.03)                                      |                                                                              |
|            | F   | 74               | 116              | 10               | 80               | 25               | 140              | 0.69 (0.12)                                      | 1.21 (0.17)                                      |                                                                              |
| Red area   | M   | 17               | 83               | 4                | 69               | 4                | 76               | 0.83 (0.38)                                      | 0.92 (0.54)                                      | Malignant neoplasm of the thyroid gland (193)                                |
|            | F   | 35               | 86               | 12               | 106              | 5                | 61               | 1.23 (0.77)                                      | 0.71 (0.77)                                      |                                                                              |
| Red area A | M   | 12               | 131              | <3               | 77               | <3               | 87               | 0.59 (0.24)                                      | 0.66 (0.69)                                      |                                                                              |
|            | F   | 18               | 97               | 5                | 98               | 3                | 103              | 1.01 (0.54)                                      | 1.06 (0.43)                                      |                                                                              |
| Red area   | M   | 656              | 101              | 145              | 106              | 179              | 102              | 1.05 (0.72)                                      | 1.01 (0.44)                                      | Malignant neoplasms of lymphoid, haematopoietic and related tissue (200-208) |
|            | F   | 545              | 91               | 106              | 91               | 139              | 86               | 1.00 (0.51)                                      | 0.95 (0.74)                                      |                                                                              |
| Red area A | M   | 289              | 99               | 61               | 100              | 75               | 94               | 1.01 (0.54)                                      | 0.95 (0.67)                                      |                                                                              |
|            | F   | 250              | 91               | 42               | 80               | 67               | 90               | 0.88 (0.20)                                      | 0.99 (0.53)                                      |                                                                              |
| Red area   | M   | 594              | 97               | 140              | 96               | 196              | 112              | 0.99 (0.46)                                      | 1.15 (0.02)                                      | Diabetes mellitus (250)                                                      |
|            | F   | 1049             | 107              | 298              | 101              | 271              | 126              | 0.94 (0.16)                                      | 1.18 (<0.01)                                     |                                                                              |
| Red area A | M   | 279              | 102              | 65               | 99               | 103              | 130              | 0.97 (0.41)                                      | 1.27 (0.01)                                      |                                                                              |
|            | F   | 469              | 104              | 145              | 108              | 117              | 117              | 1.04 (0.68)                                      | 1.13 (0.10)                                      |                                                                              |
| Red area   | M   | 11,156           | 111              | 3240             | 105              | 2266             | 116              | 0.95 (<0.01)                                     | 1.05 (0.02)                                      | Diseases of the circulatory system (390-459)                                 |
|            | F   | 13,757           | 111              | 3583             | 105              | 3166             | 115              | 0.95 (<0.01)                                     | 1.04 (0.02)                                      |                                                                              |
| Red area A | M   | 5253             | 117              | 1502             | 108              | 1083             | 122              | 0.92 (<0.01)                                     | 1.04 (0.08)                                      |                                                                              |
|            | F   | 6705             | 117              | 1672             | 107              | 1606             | 127              | 0.91 (<0.01)                                     | 1.09 (<0.01)                                     |                                                                              |
| Red area   | M   | 7632             | 108              | 2006             | 98               | 1662             | 113              | 0.91 (<0.01)                                     | 1.05 (0.03)                                      | Heart diseases (390-429)                                                     |
|            | F   | 8976             | 107              | 2062             | 98               | 2278             | 115              | 0.92 (<0.01)                                     | 1.07 (<0.01)                                     |                                                                              |
| Red area A | M   | 3534             | 112              | 926              | 101              | 783              | 117              | 0.90 (<0.01)                                     | 1.04 (0.11)                                      |                                                                              |
|            | F   | 4304             | 111              | 965              | 100              | 1119             | 122              | 0.90 (<0.01)                                     | 1.1 (<0.01)                                      |                                                                              |
| Red area   | M   | 4290             | 111              | 1150             | 100              | 876              | 118              | 0.90 (<0.01)                                     | 1.06 (0.04)                                      | Ischaemic heart diseases (410-414)                                           |
|            | F   | 3914             | 111              | 871              | 97               | 892              | 119              | 0.87 (<0.01)                                     | 1.07 (0.02)                                      |                                                                              |
| Red area A | M   | 1933             | 113              | 506              | 98               | 412              | 122              | 0.87 (<0.01)                                     | 1.08 (0.06)                                      |                                                                              |
|            | F   | 1876             | 115              | 390              | 96               | 446              | 128              | 0.83 (<0.01)                                     | 1.11 (0.01)                                      |                                                                              |
| Red area   | M   | 1534             | 114              | 549              | 110              | 285              | 124              | 0.96 (0.20)                                      | 1.09 (0.08)                                      | Diseases of the digestive system (520-579)                                   |
|            | F   | 1327             | 113              | 367              | 115              | 327              | 127              | 1.02 (0.63)                                      | 1.12 (0.02)                                      |                                                                              |
| Red area A | M   | 766              | 127              | 275              | 123              | 140              | 134              | 0.97 (0.30)                                      | 1.06 (0.26)                                      |                                                                              |
|            | F   | 645              | 120              | 200              | 138              | 147              | 123              | 1.15 (0.97)                                      | 1.02 (0.38)                                      |                                                                              |

Abbreviation: ICD-9 International classification of diseases, 9th revision; RR Relative risk

Note: One-sided mid-p-values of the null hypothesis:  $H_0$ : RR 1980-1989 to 1980-2018 = 1,  $H_1$ : 1980-1989 to 1980-2018 <1 and  $H_0$ : RR 2010-2018 to 1980-2018 = 1,  $H_1$ : RR 2010-2018 to 1980-2018 >1

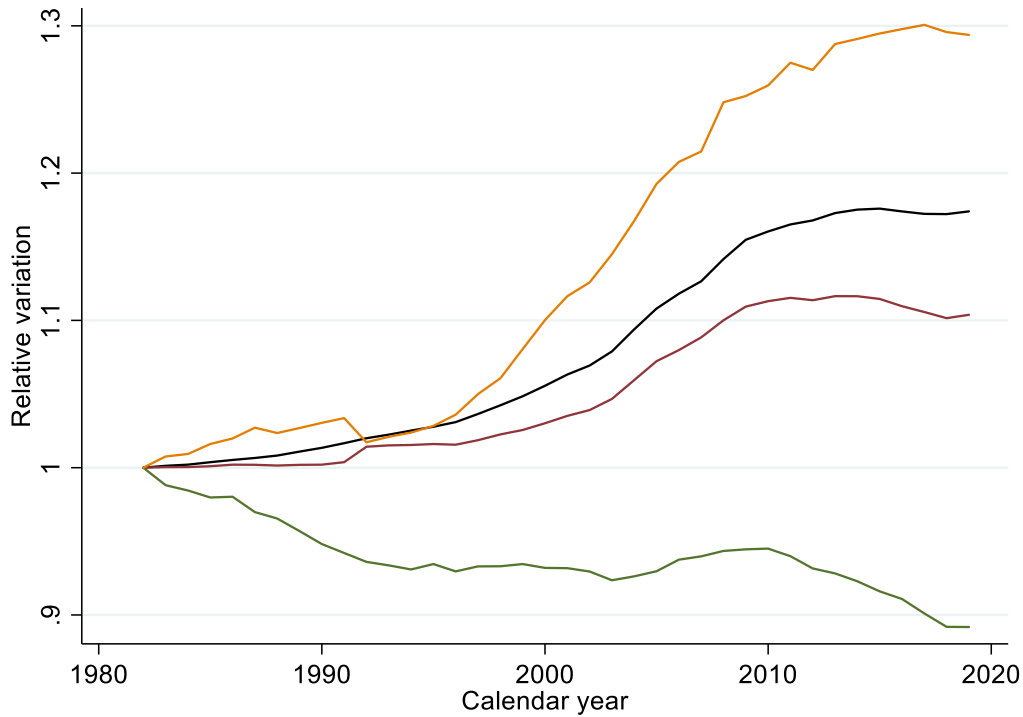

**Supplementary Fig. S1.** Relative variation of the size of the population. The reference calendar year is 1982. The black line indicates the provinces of Vicenza, Padua and Verona (northern Italy) as a whole. The red line indicates the 30 municipalities of the perfluoroalkyl and polyfluoroalkyl substances (PFAS)-contaminated *Red area*. The yellow line indicates the municipality of Lonigo. The green line indicates the municipality of Montagnana. 1982-2019. Source: Italian National Institute of Statistics (<https://demo.istat.it/>. Accessed 14 Feb 2024)

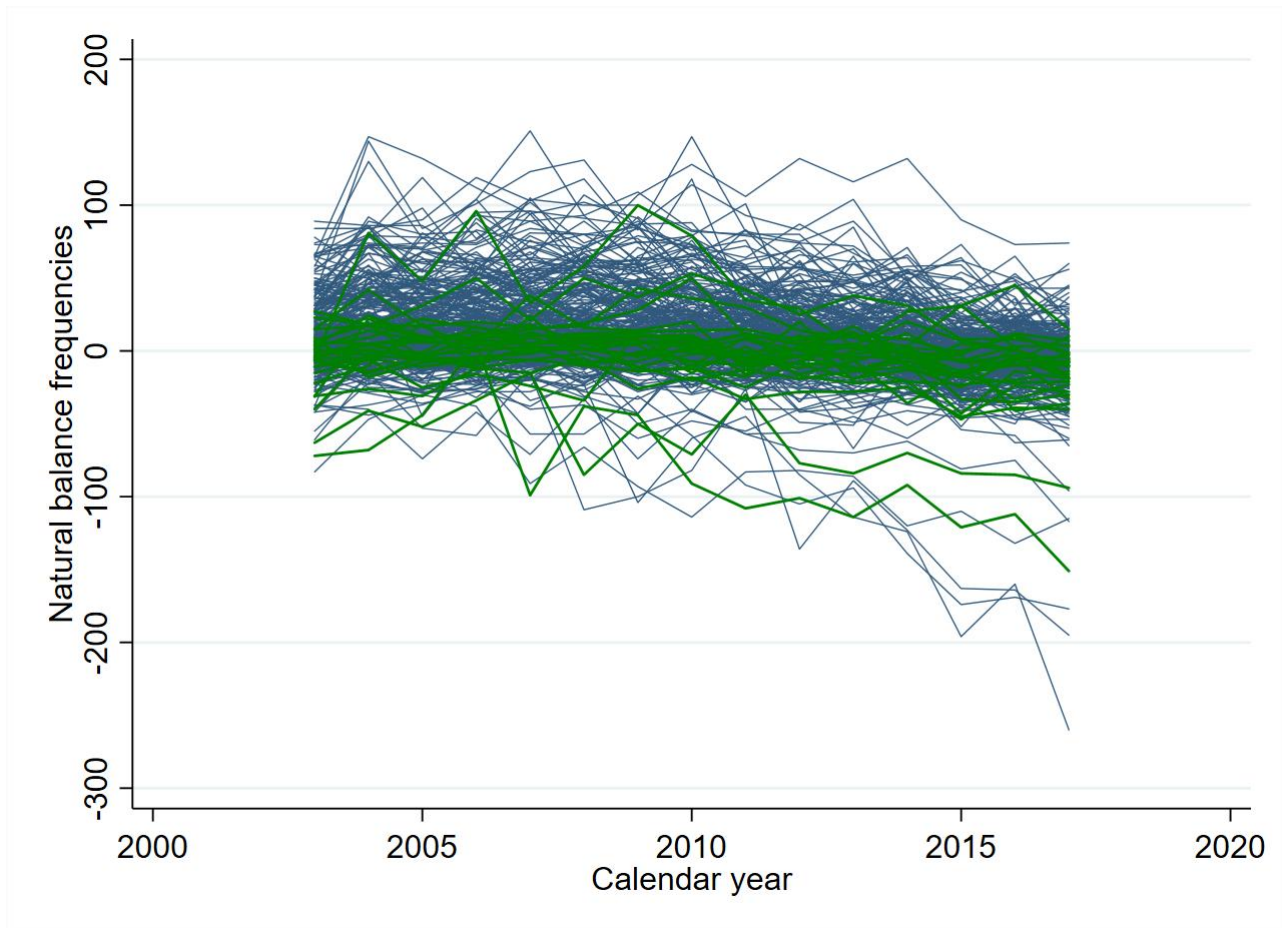

**Supplementary Fig. S2.** Natural balance of the population of the 321 municipalities of the provinces of Vicenza, Padua and Verona (northern Italy) as a whole by calendar year. The green lines indicate the 30 municipalities of the perfluoroalkyl and polyfluoroalkyl substances (PFAS)-contaminated *Red area*. The three province capital cities were excluded. Legnago and Montagnana were the municipalities of the *Red area* with the lowest natural balance. Lonigo had a positive natural balance. 2003-2017. Source: Italian National Institute of Statistics (<https://demo.istat.it/>. Accessed 14 Feb 2024)

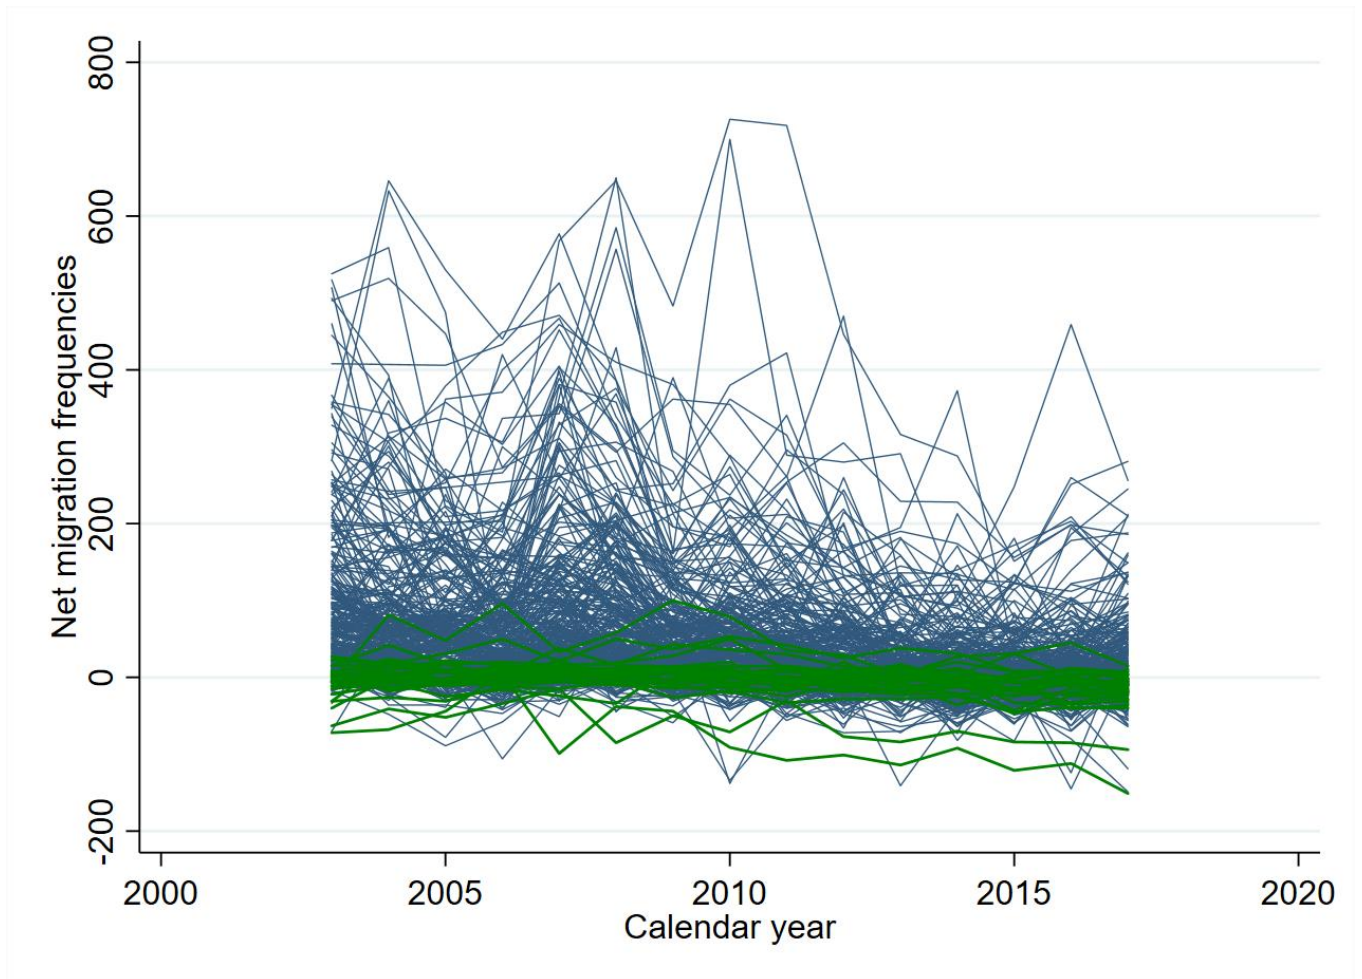

**Supplementary Fig. S3.** Net migration from the 321 municipalities of the provinces of Vicenza, Padua and Verona (northern Italy) as a whole by calendar year. The green lines indicate the 30 municipalities of the perfluoroalkyl and polyfluoroalkyl substances (PFAS)-contaminated *Red area*. The three province capital cities were excluded. Lonigo was the municipality of the *Red area* with the highest net migration. 2003-2017. Source: Italian National Institute of Statistics (<https://demo.istat.it>. Accessed 14 Feb 2024)



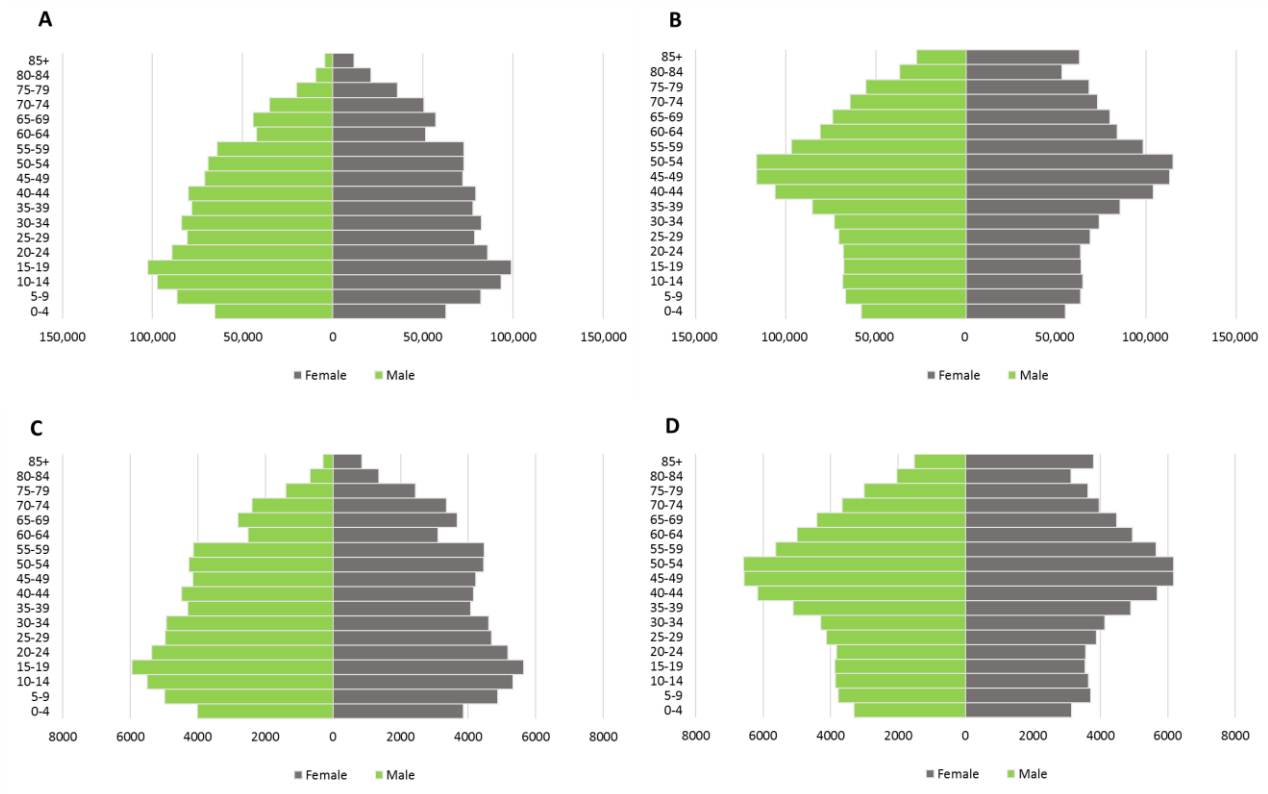

**Supplementary Fig. S4.** Age-sex pyramid of the population of the provinces of Vicenza, Padua and Verona (northern Italy) as a whole (panels A and B) and of the 30 municipalities of the perfluoroalkyl and polyfluoroalkyl substances (PFAS)-contaminated *Red area* (panels C and D). 1 January 1982 (panels A and C) and 1 January 2018 (panels B and D). Source: Italian National Institute of Statistics (<https://demo.istat.it/>). Accessed 14 Feb 2024)

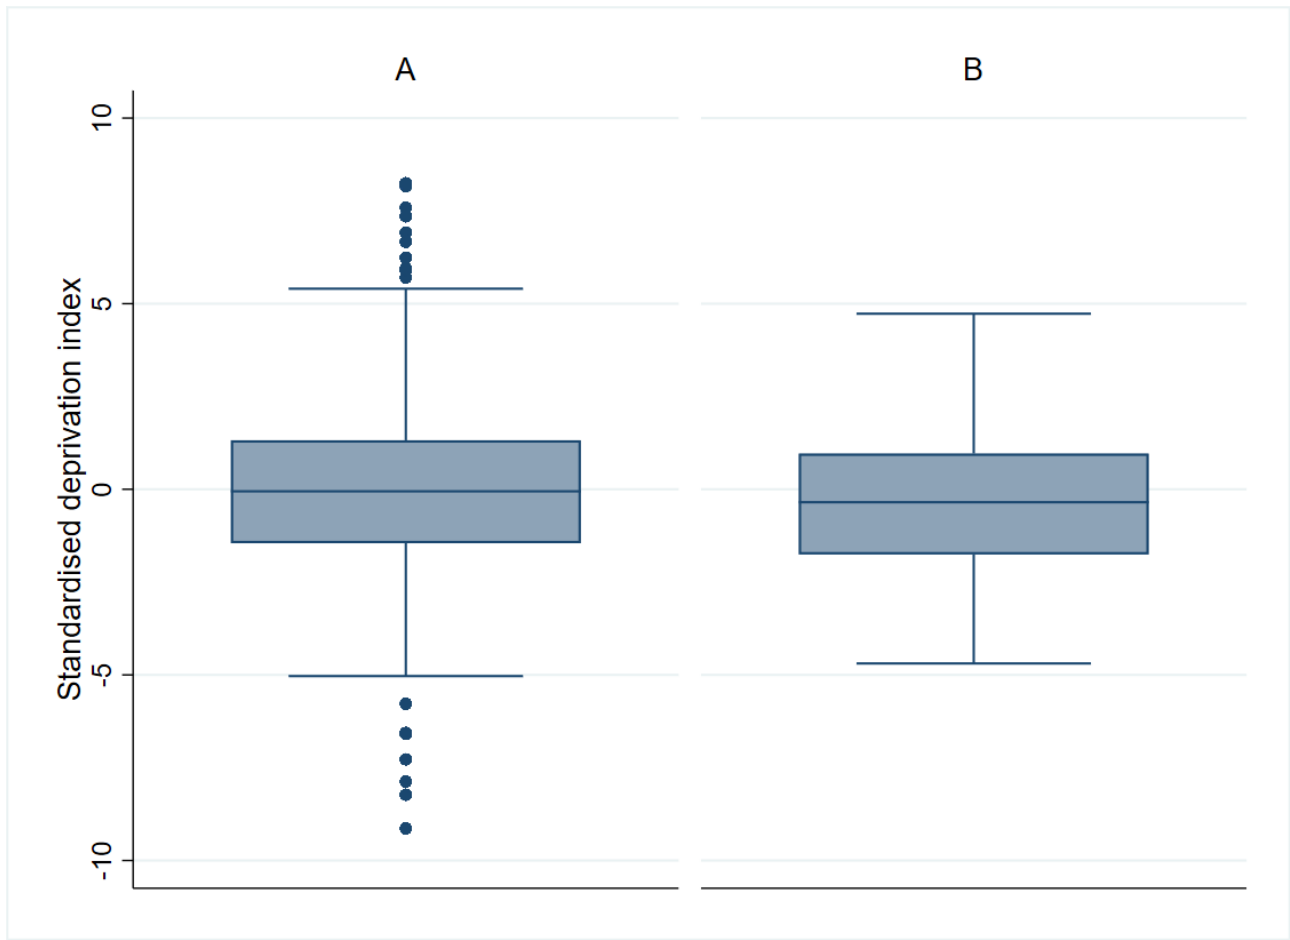

**Supplementary Fig. S5.** Box and whiskers plots of the standardised deprivation index in the provinces of Vicenza, Padua and Verona (northern Italy) as a whole (panel A) and in the 30 municipalities of the perfluoroalkyl and polyfluoroalkyl substances (PFAS)-contaminated *Red area* (panel B). 2011 census. Source: Rosano A, Pacelli B, Zengarini N, Costa G, Cislighi C, Caranci N. Aggiornamento e revisione dell'indice di deprivazione italiano 2011 a livello di sezione di censimento [Update and review of the 2011 Italian deprivation index calculated at the census section level]. *Epidemiol Prev.* 2020;44:162-70

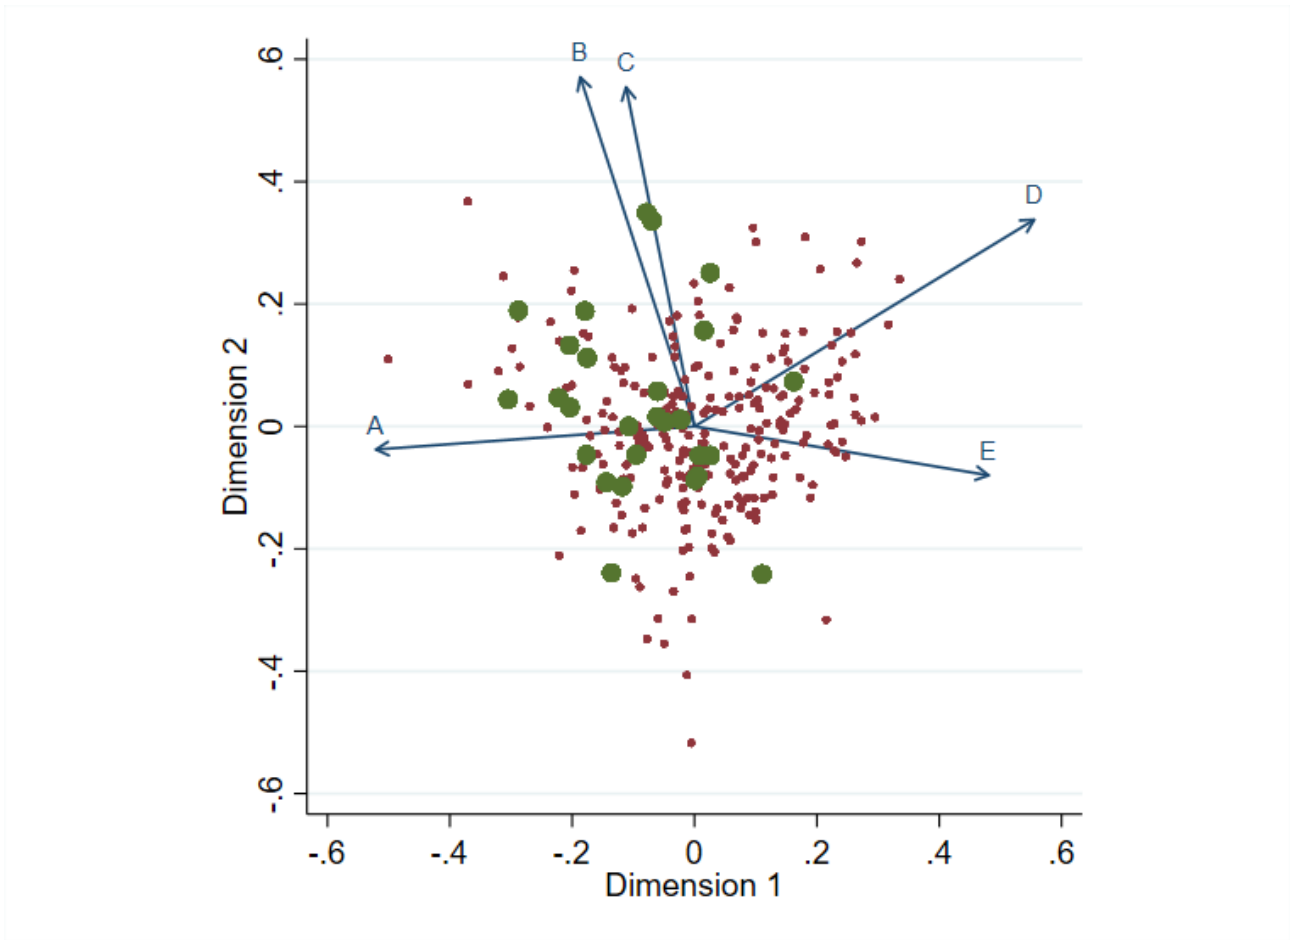

**Supplementary Fig. S6.** Biplot of the first two principal components of the five socio-demographic indicators of deprivation (low level of education (A), single parenting (B), unemployment (C), rental housing (D), and house crowding (E)). The red points indicate the 321 municipalities in the provinces of Vicenza, Padua and Verona (northern Italy) as a whole. The green points indicate the 30 municipalities of the perfluoroalkyl and polyfluoroalkyl substances (PFAS)-contaminated *Red area*. The arrows denote the vectors of the five indicators. 2011 census. Source: Rosano A, Pacelli B, Zengarini N, Costa G, Cislighi C, Caranci N. Aggiornamento e revisione dell'indice di deprivazione italiano 2011 a livello di sezione di censimento [Update and review of the 2011 Italian deprivation index calculated at the census section level]. *Epidemiol Prev.* 2020;44:162-70

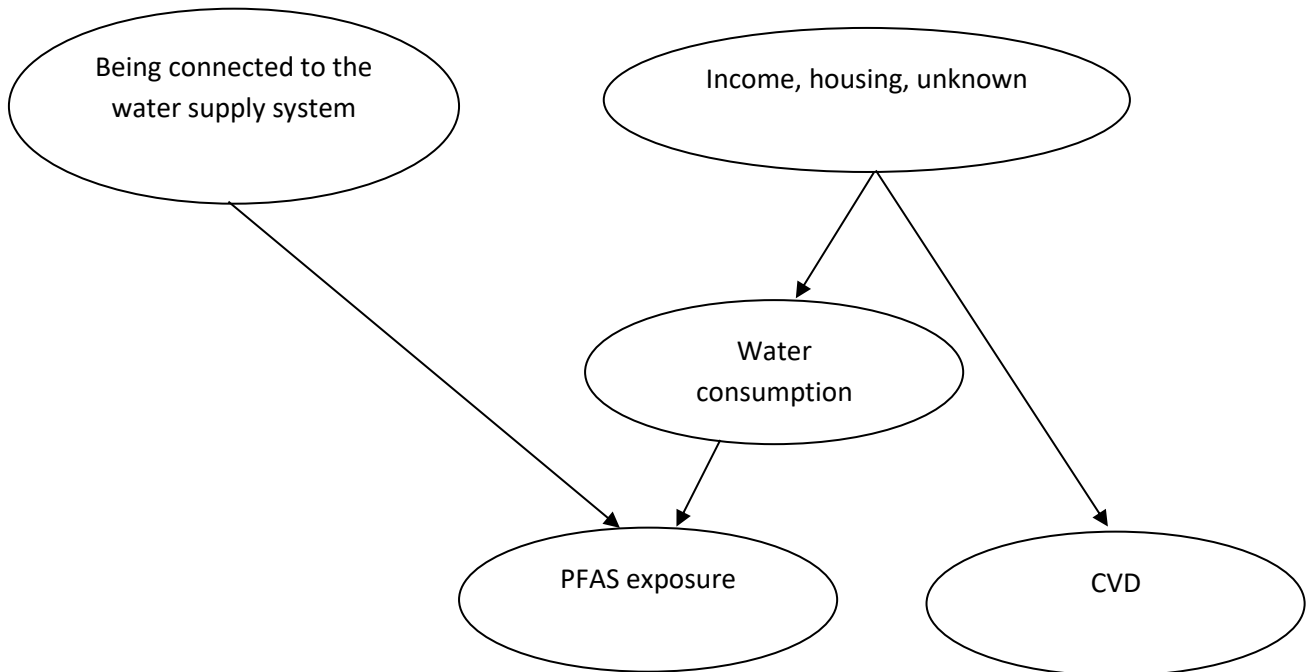

**Supplementary Fig. S7.** Directed acyclic graph of the assumed causal model. Abbreviations: *PFAS* per- and polyfluoroalkyl substances; *CVD* cardiovascular disease

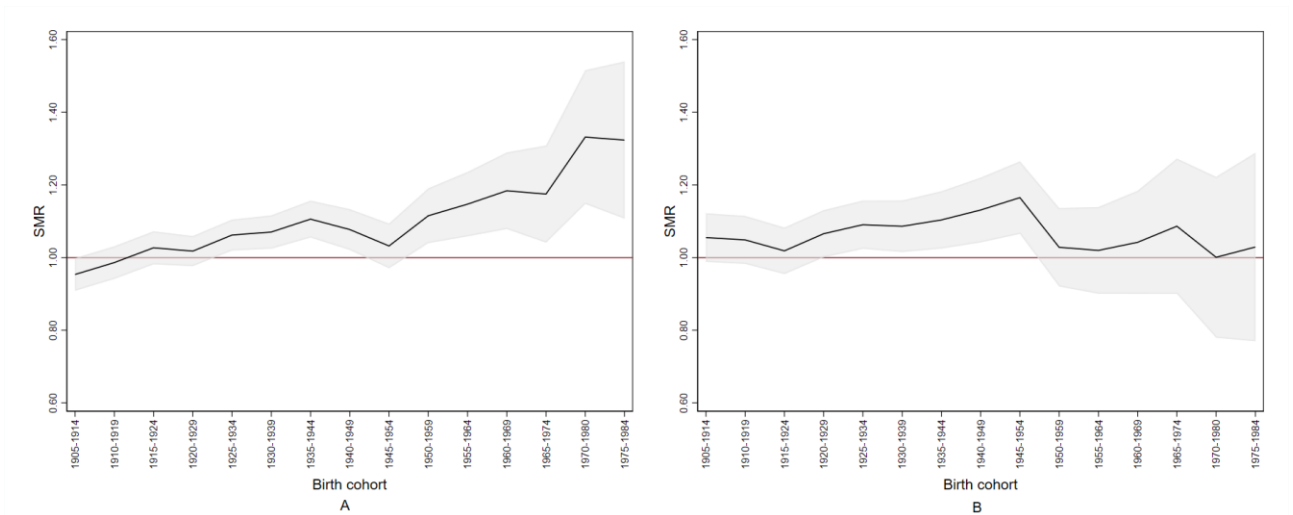

**Supplementary Fig. S8.** Sensitivity analysis. Cumulative standardised mortality ratio (SMR) for all causes by sex and birth cohort (1905-1984) in the perfluoroalkyl and polyfluoroalkyl substances (PFAS)-contaminated *Red area*. Panel A, males; panel B, females. The grey area indicates the 90% confidence band. The red line indicates the reference value. The reference population is the population of the three provinces of Vicenza, Padua and Verona (northern Italy) minus the 30 municipalities of the Red Area

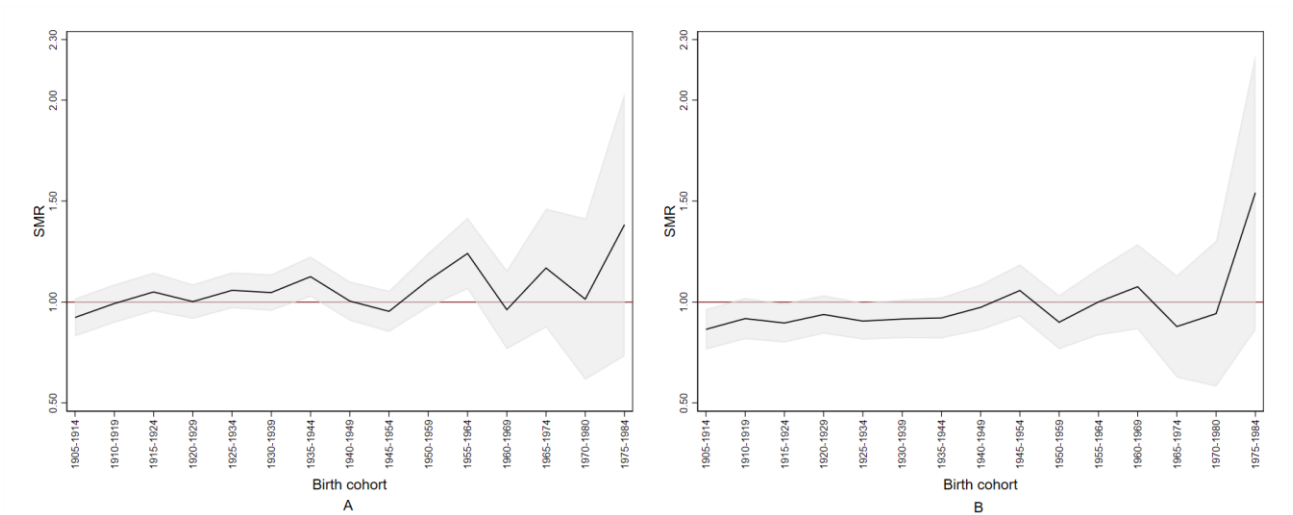

**Supplementary Fig. S9.** Sensitivity analysis. Cumulative standardised mortality ratio (SMR) for malignant neoplasms by sex and birth cohort (1905-1984) in the perfluoroalkyl and polyfluoroalkyl substances (PFAS)-contaminated *Red area*. Panel A, males; panel B, females. The grey area indicates the 90% confidence band. The red line indicates the reference value. The reference population is the population of the three provinces of Vicenza, Padua and Verona (northern Italy) minus the 30 municipalities of the Red Area
